# Supplementary material for: Absence of effects of widespread badger culling on tuberculosis in cattle
Source: Research Square preprint supplement (doi:10.21203/rs.3.rs-2362912/v1), 2022-12-13
Supplement: Supplementary file 1 [file 2333f0af683e585a4a1f55a2.xlsx]

## Sheet: Guidance notes
Raw data contained within this spreadsheet have been used to compile analyses presented in the paper "Positive and negative effects of widespread badger culling on cattle tuberculosis".
In order to find the information that you require please use the following guidelines:
Data have been split and displayed on four separate datasheets within this spreadsheet:
- 'RBCT - From initial cull' shows data using herd locations from the RBCT database and incidents that have occurred since the initial cull in each triplet
- 'RBCT - From follow up' shows data using herd locations from the RBCT database and only incidents that have occurred since the first follow-up cull in each triplet
- 'VETNET - From initial cull' shows data using herd locations from the VETNET database and incidents that have occurred since the initial cull in each triplet
- 'VETNET - From follow up' shows data using herd locations from the RBCT database and only incidents that have occurred since the first follow-up cull in each triplet
Within each sheet, there are either 6 or 8 tables to be referred to which separate the data in the following way:
- All data in all tables are split by triplet (A - J) and treatment (proactive or survey only)
- Data have then been separated to show information for the whole trial area (pertaining to that triplet and treatment), the inner trial area (≥2km inside trial area boundaries), the outer trial area (<2km inside trial area boundaries) and the neighbouring area (≤2km outside trial area boundaries)
- Data have additionally been separated to show both the numbers of incidents which are 'confirmed' and the number of 'confirmed' and 'unconfirmed' incidents
- Only data using VETNET locations are given for the neighbouring areas, because data in the RBCT database did not extend as far as 2km beyond trial area boundaries
- In each case, historic incidence is presented as calculated over 3 years and 1 year separately.

## Sheet: RBCT - From initial cull
Triplet	Treatment	Source of location data	Region	Type of breakdown	Time period	Incidence	Baseline herds	Historic incidence (3 year)	Historic incidence (1 year)		Triplet	Treatment	Source of location data	Region	Type of breakdown	Time period	Incidence	Baseline herds	Historic incidence (3 year)	Historic incidence (1 year)
A	Proactive	RBCT	Whole trial area	Confirmed	From initial cull	38	59	29	9		A	Proactive	RBCT	Whole trial area	All breakdowns	From initial cull	52	59	35	11
A	Survey-only	RBCT	Whole trial area	Confirmed	From initial cull	55	75	34	11		A	Survey-only	RBCT	Whole trial area	All breakdowns	From initial cull	74	75	48	18
B	Proactive	RBCT	Whole trial area	Confirmed	From initial cull	91	132	41	16		B	Proactive	RBCT	Whole trial area	All breakdowns	From initial cull	119	132	59	22
B	Survey-only	RBCT	Whole trial area	Confirmed	From initial cull	61	112	26	5		B	Survey-only	RBCT	Whole trial area	All breakdowns	From initial cull	83	112	32	6
C	Proactive	RBCT	Whole trial area	Confirmed	From initial cull	36	104	19	10		C	Proactive	RBCT	Whole trial area	All breakdowns	From initial cull	48	104	25	14
C	Survey-only	RBCT	Whole trial area	Confirmed	From initial cull	93	169	30	17		C	Survey-only	RBCT	Whole trial area	All breakdowns	From initial cull	133	169	46	24
D	Proactive	RBCT	Whole trial area	Confirmed	From initial cull	29	67	26	11		D	Proactive	RBCT	Whole trial area	All breakdowns	From initial cull	40	67	34	13
D	Survey-only	RBCT	Whole trial area	Confirmed	From initial cull	36	69	27	7		D	Survey-only	RBCT	Whole trial area	All breakdowns	From initial cull	46	69	33	10
E	Proactive	RBCT	Whole trial area	Confirmed	From initial cull	40	86	23	5		E	Proactive	RBCT	Whole trial area	All breakdowns	From initial cull	82	86	28	9
E	Survey-only	RBCT	Whole trial area	Confirmed	From initial cull	50	79	27	13		E	Survey-only	RBCT	Whole trial area	All breakdowns	From initial cull	69	79	35	16
F	Proactive	RBCT	Whole trial area	Confirmed	From initial cull	15	111	12	4		F	Proactive	RBCT	Whole trial area	All breakdowns	From initial cull	35	111	18	5
F	Survey-only	RBCT	Whole trial area	Confirmed	From initial cull	70	183	37	11		F	Survey-only	RBCT	Whole trial area	All breakdowns	From initial cull	106	183	59	18
G	Proactive	RBCT	Whole trial area	Confirmed	From initial cull	65	173	19	6		G	Proactive	RBCT	Whole trial area	All breakdowns	From initial cull	93	173	34	11
G	Survey-only	RBCT	Whole trial area	Confirmed	From initial cull	40	103	15	4		G	Survey-only	RBCT	Whole trial area	All breakdowns	From initial cull	49	103	27	9
H	Proactive	RBCT	Whole trial area	Confirmed	From initial cull	34	55	22	11		H	Proactive	RBCT	Whole trial area	All breakdowns	From initial cull	46	55	25	13
H	Survey-only	RBCT	Whole trial area	Confirmed	From initial cull	32	117	26	8		H	Survey-only	RBCT	Whole trial area	All breakdowns	From initial cull	51	117	33	10
I	Proactive	RBCT	Whole trial area	Confirmed	From initial cull	30	82	32	18		I	Proactive	RBCT	Whole trial area	All breakdowns	From initial cull	41	82	39	19
I	Survey-only	RBCT	Whole trial area	Confirmed	From initial cull	19	78	17	6		I	Survey-only	RBCT	Whole trial area	All breakdowns	From initial cull	41	78	24	8
J	Proactive	RBCT	Whole trial area	Confirmed	From initial cull	39	117	30	10		J	Proactive	RBCT	Whole trial area	All breakdowns	From initial cull	58	117	44	13
J	Survey-only	RBCT	Whole trial area	Confirmed	From initial cull	37	122	17	10		J	Survey-only	RBCT	Whole trial area	All breakdowns	From initial cull	65	122	26	16
Triplet	Treatment	Source of location data	Region	Type of breakdown	Time period	Incidence	Baseline herds	Historic incidence (3 year)	Historic incidence (1 year)		Triplet	Treatment	Source of location data	Region	Type of breakdown	Time period	Incidence	Baseline herds	Historic incidence (3 year)	Historic incidence (1 year)
A	Proactive	RBCT	Inner trial area	Confirmed	From initial cull	11	17	6	1		A	Proactive	RBCT	Inner trial area	All breakdowns	From initial cull	12	17	7	1
A	Survey-only	RBCT	Inner trial area	Confirmed	From initial cull	18	23	11	3		A	Survey-only	RBCT	Inner trial area	All breakdowns	From initial cull	27	23	16	5
B	Proactive	RBCT	Inner trial area	Confirmed	From initial cull	19	31	13	4		B	Proactive	RBCT	Inner trial area	All breakdowns	From initial cull	25	31	16	5
B	Survey-only	RBCT	Inner trial area	Confirmed	From initial cull	7	15	4	0		B	Survey-only	RBCT	Inner trial area	All breakdowns	From initial cull	12	15	4	0
C	Proactive	RBCT	Inner trial area	Confirmed	From initial cull	13	36	1	1		C	Proactive	RBCT	Inner trial area	All breakdowns	From initial cull	14	36	3	3
C	Survey-only	RBCT	Inner trial area	Confirmed	From initial cull	28	45	4	2		C	Survey-only	RBCT	Inner trial area	All breakdowns	From initial cull	42	45	9	5
D	Proactive	RBCT	Inner trial area	Confirmed	From initial cull	10	25	12	4		D	Proactive	RBCT	Inner trial area	All breakdowns	From initial cull	14	25	16	5
D	Survey-only	RBCT	Inner trial area	Confirmed	From initial cull	11	24	13	2		D	Survey-only	RBCT	Inner trial area	All breakdowns	From initial cull	17	24	17	4
E	Proactive	RBCT	Inner trial area	Confirmed	From initial cull	12	24	8	1		E	Proactive	RBCT	Inner trial area	All breakdowns	From initial cull	22	24	8	1
E	Survey-only	RBCT	Inner trial area	Confirmed	From initial cull	8	10	2	2		E	Survey-only	RBCT	Inner trial area	All breakdowns	From initial cull	9	10	3	2
F	Proactive	RBCT	Inner trial area	Confirmed	From initial cull	3	24	2	0		F	Proactive	RBCT	Inner trial area	All breakdowns	From initial cull	6	24	3	0
F	Survey-only	RBCT	Inner trial area	Confirmed	From initial cull	19	57	14	4		F	Survey-only	RBCT	Inner trial area	All breakdowns	From initial cull	28	57	21	6
G	Proactive	RBCT	Inner trial area	Confirmed	From initial cull	12	52	11	3		G	Proactive	RBCT	Inner trial area	All breakdowns	From initial cull	27	52	15	5
G	Survey-only	RBCT	Inner trial area	Confirmed	From initial cull	11	27	7	3		G	Survey-only	RBCT	Inner trial area	All breakdowns	From initial cull	15	27	10	6
H	Proactive	RBCT	Inner trial area	Confirmed	From initial cull	14	15	8	1		H	Proactive	RBCT	Inner trial area	All breakdowns	From initial cull	17	15	8	1
H	Survey-only	RBCT	Inner trial area	Confirmed	From initial cull	6	19	3	1		H	Survey-only	RBCT	Inner trial area	All breakdowns	From initial cull	7	19	5	2
I	Proactive	RBCT	Inner trial area	Confirmed	From initial cull	12	31	9	6		I	Proactive	RBCT	Inner trial area	All breakdowns	From initial cull	17	31	11	7
I	Survey-only	RBCT	Inner trial area	Confirmed	From initial cull	6	22	6	1		I	Survey-only	RBCT	Inner trial area	All breakdowns	From initial cull	12	22	7	2
J	Proactive	RBCT	Inner trial area	Confirmed	From initial cull	11	27	10	4		J	Proactive	RBCT	Inner trial area	All breakdowns	From initial cull	13	27	13	5
J	Survey-only	RBCT	Inner trial area	Confirmed	From initial cull	15	40	12	6		J	Survey-only	RBCT	Inner trial area	All breakdowns	From initial cull	24	40	15	9
Triplet	Treatment	Source of location data	Region	Type of breakdown	Time period	Incidence	Baseline herds	Historic incidence (3 year)	Historic incidence (1 year)		Triplet	Treatment	Source of location data	Region	Type of breakdown	Time period	Incidence	Baseline herds	Historic incidence (3 year)	Historic incidence (1 year)
A	Proactive	RBCT	Outer trial area	Confirmed	From initial cull	27	42	23	8		A	Proactive	RBCT	Outer trial area	All breakdowns	From initial cull	40	42	28	10
A	Survey-only	RBCT	Outer trial area	Confirmed	From initial cull	37	51	23	8		A	Survey-only	RBCT	Outer trial area	All breakdowns	From initial cull	47	51	32	13
B	Proactive	RBCT	Outer trial area	Confirmed	From initial cull	72	100	28	12		B	Proactive	RBCT	Outer trial area	All breakdowns	From initial cull	94	100	43	17
B	Survey-only	RBCT	Outer trial area	Confirmed	From initial cull	54	96	21	4		B	Survey-only	RBCT	Outer trial area	All breakdowns	From initial cull	71	96	27	5
C	Proactive	RBCT	Outer trial area	Confirmed	From initial cull	23	64	17	9		C	Proactive	RBCT	Outer trial area	All breakdowns	From initial cull	33	64	21	11
C	Survey-only	RBCT	Outer trial area	Confirmed	From initial cull	63	121	26	15		C	Survey-only	RBCT	Outer trial area	All breakdowns	From initial cull	88	121	36	18
D	Proactive	RBCT	Outer trial area	Confirmed	From initial cull	19	41	14	7		D	Proactive	RBCT	Outer trial area	All breakdowns	From initial cull	26	41	18	8
D	Survey-only	RBCT	Outer trial area	Confirmed	From initial cull	25	44	14	5		D	Survey-only	RBCT	Outer trial area	All breakdowns	From initial cull	29	44	16	6
E	Proactive	RBCT	Outer trial area	Confirmed	From initial cull	28	60	15	4		E	Proactive	RBCT	Outer trial area	All breakdowns	From initial cull	60	60	19	7
E	Survey-only	RBCT	Outer trial area	Confirmed	From initial cull	42	64	23	11		E	Survey-only	RBCT	Outer trial area	All breakdowns	From initial cull	57	64	29	13
F	Proactive	RBCT	Outer trial area	Confirmed	From initial cull	10	86	10	4		F	Proactive	RBCT	Outer trial area	All breakdowns	From initial cull	27	86	15	5
F	Survey-only	RBCT	Outer trial area	Confirmed	From initial cull	51	124	22	6		F	Survey-only	RBCT	Outer trial area	All breakdowns	From initial cull	76	124	37	11
G	Proactive	RBCT	Outer trial area	Confirmed	From initial cull	52	118	8	3		G	Proactive	RBCT	Outer trial area	All breakdowns	From initial cull	65	118	18	5
G	Survey-only	RBCT	Outer trial area	Confirmed	From initial cull	29	72	8	1		G	Survey-only	RBCT	Outer trial area	All breakdowns	From initial cull	32	72	16	3
H	Proactive	RBCT	Outer trial area	Confirmed	From initial cull	20	40	14	10		H	Proactive	RBCT	Outer trial area	All breakdowns	From initial cull	29	40	17	12
H	Survey-only	RBCT	Outer trial area	Confirmed	From initial cull	25	94	21	6		H	Survey-only	RBCT	Outer trial area	All breakdowns	From initial cull	43	94	25	6
I	Proactive	RBCT	Outer trial area	Confirmed	From initial cull	18	51	23	12		I	Proactive	RBCT	Outer trial area	All breakdowns	From initial cull	24	51	28	12
I	Survey-only	RBCT	Outer trial area	Confirmed	From initial cull	13	55	11	5		I	Survey-only	RBCT	Outer trial area	All breakdowns	From initial cull	29	55	17	6
J	Proactive	RBCT	Outer trial area	Confirmed	From initial cull	28	90	20	6		J	Proactive	RBCT	Outer trial area	All breakdowns	From initial cull	45	90	31	8
J	Survey-only	RBCT	Outer trial area	Confirmed	From initial cull	22	81	5	4		J	Survey-only	RBCT	Outer trial area	All breakdowns	From initial cull	41	81	11	7

## Sheet: RBCT - From follow up
Triplet	Treatment	Source of location data	Region	Type of breakdown	Time period	Incidence	Baseline herds	Historic incidence (3 year)	Historic incidence (1 year)		Triplet	Treatment	Source of location data	Region	Type of breakdown	Time period	Incidence	Baseline herds	Historic incidence (3 year)	Historic incidence (1 year)
A	Proactive	RBCT	Whole trial area	Confirmed	From follow up	18	59	29	9		A	Proactive	RBCT	Whole trial area	All breakdowns	From follow up	28	59	35	11
A	Survey-only	RBCT	Whole trial area	Confirmed	From follow up	34	75	34	11		A	Survey-only	RBCT	Whole trial area	All breakdowns	From follow up	49	75	48	18
B	Proactive	RBCT	Whole trial area	Confirmed	From follow up	80	132	41	16		B	Proactive	RBCT	Whole trial area	All breakdowns	From follow up	103	132	59	22
B	Survey-only	RBCT	Whole trial area	Confirmed	From follow up	60	112	26	5		B	Survey-only	RBCT	Whole trial area	All breakdowns	From follow up	80	112	32	6
C	Proactive	RBCT	Whole trial area	Confirmed	From follow up	28	104	19	10		C	Proactive	RBCT	Whole trial area	All breakdowns	From follow up	37	104	25	14
C	Survey-only	RBCT	Whole trial area	Confirmed	From follow up	80	169	30	17		C	Survey-only	RBCT	Whole trial area	All breakdowns	From follow up	113	169	46	24
D	Proactive	RBCT	Whole trial area	Confirmed	From follow up	27	67	26	11		D	Proactive	RBCT	Whole trial area	All breakdowns	From follow up	38	67	34	13
D	Survey-only	RBCT	Whole trial area	Confirmed	From follow up	27	69	27	7		D	Survey-only	RBCT	Whole trial area	All breakdowns	From follow up	35	69	33	10
E	Proactive	RBCT	Whole trial area	Confirmed	From follow up	33	86	23	5		E	Proactive	RBCT	Whole trial area	All breakdowns	From follow up	70	86	28	9
E	Survey-only	RBCT	Whole trial area	Confirmed	From follow up	39	79	27	13		E	Survey-only	RBCT	Whole trial area	All breakdowns	From follow up	54	79	35	16
F	Proactive	RBCT	Whole trial area	Confirmed	From follow up	10	111	12	4		F	Proactive	RBCT	Whole trial area	All breakdowns	From follow up	29	111	18	5
F	Survey-only	RBCT	Whole trial area	Confirmed	From follow up	44	183	37	11		F	Survey-only	RBCT	Whole trial area	All breakdowns	From follow up	72	183	59	18
G	Proactive	RBCT	Whole trial area	Confirmed	From follow up	41	173	19	6		G	Proactive	RBCT	Whole trial area	All breakdowns	From follow up	62	173	34	11
G	Survey-only	RBCT	Whole trial area	Confirmed	From follow up	29	103	15	4		G	Survey-only	RBCT	Whole trial area	All breakdowns	From follow up	34	103	27	9
H	Proactive	RBCT	Whole trial area	Confirmed	From follow up	25	55	22	11		H	Proactive	RBCT	Whole trial area	All breakdowns	From follow up	33	55	25	13
H	Survey-only	RBCT	Whole trial area	Confirmed	From follow up	23	117	26	8		H	Survey-only	RBCT	Whole trial area	All breakdowns	From follow up	37	117	33	10
I	Proactive	RBCT	Whole trial area	Confirmed	From follow up	18	82	32	18		I	Proactive	RBCT	Whole trial area	All breakdowns	From follow up	23	82	39	19
I	Survey-only	RBCT	Whole trial area	Confirmed	From follow up	13	78	17	6		I	Survey-only	RBCT	Whole trial area	All breakdowns	From follow up	24	78	24	8
J	Proactive	RBCT	Whole trial area	Confirmed	From follow up	23	117	30	10		J	Proactive	RBCT	Whole trial area	All breakdowns	From follow up	39	117	44	13
J	Survey-only	RBCT	Whole trial area	Confirmed	From follow up	28	122	17	10		J	Survey-only	RBCT	Whole trial area	All breakdowns	From follow up	44	122	26	16
Triplet	Treatment	Source of location data	Region	Type of breakdown	Time period	Incidence	Baseline herds	Historic incidence (3 year)	Historic incidence (1 year)		Triplet	Treatment	Source of location data	Region	Type of breakdown	Time period	Incidence	Baseline herds	Historic incidence (3 year)	Historic incidence (1 year)
A	Proactive	RBCT	Inner trial area	Confirmed	From follow up	4	17	6	1		A	Proactive	RBCT	Inner trial area	All breakdowns	From follow up	5	17	7	1
A	Survey-only	RBCT	Inner trial area	Confirmed	From follow up	11	23	11	3		A	Survey-only	RBCT	Inner trial area	All breakdowns	From follow up	17	23	16	5
B	Proactive	RBCT	Inner trial area	Confirmed	From follow up	15	31	13	4		B	Proactive	RBCT	Inner trial area	All breakdowns	From follow up	20	31	16	5
B	Survey-only	RBCT	Inner trial area	Confirmed	From follow up	7	15	4	0		B	Survey-only	RBCT	Inner trial area	All breakdowns	From follow up	12	15	4	0
C	Proactive	RBCT	Inner trial area	Confirmed	From follow up	11	36	1	1		C	Proactive	RBCT	Inner trial area	All breakdowns	From follow up	11	36	3	3
C	Survey-only	RBCT	Inner trial area	Confirmed	From follow up	27	45	4	2		C	Survey-only	RBCT	Inner trial area	All breakdowns	From follow up	41	45	9	5
D	Proactive	RBCT	Inner trial area	Confirmed	From follow up	10	25	12	4		D	Proactive	RBCT	Inner trial area	All breakdowns	From follow up	14	25	16	5
D	Survey-only	RBCT	Inner trial area	Confirmed	From follow up	10	24	13	2		D	Survey-only	RBCT	Inner trial area	All breakdowns	From follow up	15	24	17	4
E	Proactive	RBCT	Inner trial area	Confirmed	From follow up	10	24	8	1		E	Proactive	RBCT	Inner trial area	All breakdowns	From follow up	19	24	8	1
E	Survey-only	RBCT	Inner trial area	Confirmed	From follow up	7	10	2	2		E	Survey-only	RBCT	Inner trial area	All breakdowns	From follow up	8	10	3	2
F	Proactive	RBCT	Inner trial area	Confirmed	From follow up	2	24	2	0		F	Proactive	RBCT	Inner trial area	All breakdowns	From follow up	5	24	3	0
F	Survey-only	RBCT	Inner trial area	Confirmed	From follow up	12	57	14	4		F	Survey-only	RBCT	Inner trial area	All breakdowns	From follow up	18	57	21	6
G	Proactive	RBCT	Inner trial area	Confirmed	From follow up	8	52	11	3		G	Proactive	RBCT	Inner trial area	All breakdowns	From follow up	19	52	15	5
G	Survey-only	RBCT	Inner trial area	Confirmed	From follow up	6	27	7	3		G	Survey-only	RBCT	Inner trial area	All breakdowns	From follow up	8	27	10	6
H	Proactive	RBCT	Inner trial area	Confirmed	From follow up	10	15	8	1		H	Proactive	RBCT	Inner trial area	All breakdowns	From follow up	11	15	8	1
H	Survey-only	RBCT	Inner trial area	Confirmed	From follow up	4	19	3	1		H	Survey-only	RBCT	Inner trial area	All breakdowns	From follow up	5	19	5	2
I	Proactive	RBCT	Inner trial area	Confirmed	From follow up	8	31	9	6		I	Proactive	RBCT	Inner trial area	All breakdowns	From follow up	9	31	11	7
I	Survey-only	RBCT	Inner trial area	Confirmed	From follow up	4	22	6	1		I	Survey-only	RBCT	Inner trial area	All breakdowns	From follow up	8	22	7	2
J	Proactive	RBCT	Inner trial area	Confirmed	From follow up	5	27	10	4		J	Proactive	RBCT	Inner trial area	All breakdowns	From follow up	5	27	13	5
J	Survey-only	RBCT	Inner trial area	Confirmed	From follow up	12	40	12	6		J	Survey-only	RBCT	Inner trial area	All breakdowns	From follow up	17	40	15	9
Triplet	Treatment	Source of location data	Region	Type of breakdown	Time period	Incidence	Baseline herds	Historic incidence (3 year)	Historic incidence (1 year)		Triplet	Treatment	Source of location data	Region	Type of breakdown	Time period	Incidence	Baseline herds	Historic incidence (3 year)	Historic incidence (1 year)
A	Proactive	RBCT	Outer trial area	Confirmed	From follow up	14	42	23	8		A	Proactive	RBCT	Outer trial area	All breakdowns	From follow up	23	42	28	10
A	Survey-only	RBCT	Outer trial area	Confirmed	From follow up	23	51	23	8		A	Survey-only	RBCT	Outer trial area	All breakdowns	From follow up	32	51	32	13
B	Proactive	RBCT	Outer trial area	Confirmed	From follow up	65	100	28	12		B	Proactive	RBCT	Outer trial area	All breakdowns	From follow up	83	100	43	17
B	Survey-only	RBCT	Outer trial area	Confirmed	From follow up	53	96	21	4		B	Survey-only	RBCT	Outer trial area	All breakdowns	From follow up	68	96	27	5
C	Proactive	RBCT	Outer trial area	Confirmed	From follow up	17	64	17	9		C	Proactive	RBCT	Outer trial area	All breakdowns	From follow up	25	64	21	11
C	Survey-only	RBCT	Outer trial area	Confirmed	From follow up	51	121	26	15		C	Survey-only	RBCT	Outer trial area	All breakdowns	From follow up	69	121	36	18
D	Proactive	RBCT	Outer trial area	Confirmed	From follow up	17	41	14	7		D	Proactive	RBCT	Outer trial area	All breakdowns	From follow up	24	41	18	8
D	Survey-only	RBCT	Outer trial area	Confirmed	From follow up	17	44	14	5		D	Survey-only	RBCT	Outer trial area	All breakdowns	From follow up	20	44	16	6
E	Proactive	RBCT	Outer trial area	Confirmed	From follow up	23	60	15	4		E	Proactive	RBCT	Outer trial area	All breakdowns	From follow up	51	60	19	7
E	Survey-only	RBCT	Outer trial area	Confirmed	From follow up	32	64	23	11		E	Survey-only	RBCT	Outer trial area	All breakdowns	From follow up	44	64	29	13
F	Proactive	RBCT	Outer trial area	Confirmed	From follow up	6	86	10	4		F	Proactive	RBCT	Outer trial area	All breakdowns	From follow up	22	86	15	5
F	Survey-only	RBCT	Outer trial area	Confirmed	From follow up	32	124	22	6		F	Survey-only	RBCT	Outer trial area	All breakdowns	From follow up	53	124	37	11
G	Proactive	RBCT	Outer trial area	Confirmed	From follow up	32	118	8	3		G	Proactive	RBCT	Outer trial area	All breakdowns	From follow up	42	118	18	5
G	Survey-only	RBCT	Outer trial area	Confirmed	From follow up	23	72	8	1		G	Survey-only	RBCT	Outer trial area	All breakdowns	From follow up	24	72	16	3
H	Proactive	RBCT	Outer trial area	Confirmed	From follow up	15	40	14	10		H	Proactive	RBCT	Outer trial area	All breakdowns	From follow up	22	40	17	12
H	Survey-only	RBCT	Outer trial area	Confirmed	From follow up	18	94	21	6		H	Survey-only	RBCT	Outer trial area	All breakdowns	From follow up	31	94	25	6
I	Proactive	RBCT	Outer trial area	Confirmed	From follow up	10	51	23	12		I	Proactive	RBCT	Outer trial area	All breakdowns	From follow up	14	51	28	12
I	Survey-only	RBCT	Outer trial area	Confirmed	From follow up	9	55	11	5		I	Survey-only	RBCT	Outer trial area	All breakdowns	From follow up	16	55	17	6
J	Proactive	RBCT	Outer trial area	Confirmed	From follow up	18	90	20	6		J	Proactive	RBCT	Outer trial area	All breakdowns	From follow up	34	90	31	8
J	Survey-only	RBCT	Outer trial area	Confirmed	From follow up	16	81	5	4		J	Survey-only	RBCT	Outer trial area	All breakdowns	From follow up	27	81	11	7

## Sheet: VETNET - From initial cull
Triplet	Treatment	Source of location data	Region	Type of breakdown	Time period	Incidence	Baseline herds	Historic incidence (3 year)	Historic incidence (1 year)		Triplet	Treatment	Source of location data	Region	Type of breakdown	Time period	Incidence	Baseline herds	Historic incidence (3 year)	Historic incidence (1 year)
A	Proactive	VETNET	Whole trial area	Confirmed	From initial cull	37	71	33	8		A	Proactive	VETNET	Whole trial area	All breakdowns	From initial cull	52	71	38	10
A	Survey-only	VETNET	Whole trial area	Confirmed	From initial cull	52	86	32	7		A	Survey-only	VETNET	Whole trial area	All breakdowns	From initial cull	73	86	45	13
B	Proactive	VETNET	Whole trial area	Confirmed	From initial cull	87	152	42	15		B	Proactive	VETNET	Whole trial area	All breakdowns	From initial cull	110	152	61	21
B	Survey-only	VETNET	Whole trial area	Confirmed	From initial cull	61	132	27	5		B	Survey-only	VETNET	Whole trial area	All breakdowns	From initial cull	81	132	34	8
C	Proactive	VETNET	Whole trial area	Confirmed	From initial cull	29	105	15	8		C	Proactive	VETNET	Whole trial area	All breakdowns	From initial cull	40	105	21	12
C	Survey-only	VETNET	Whole trial area	Confirmed	From initial cull	84	174	27	14		C	Survey-only	VETNET	Whole trial area	All breakdowns	From initial cull	120	174	41	19
D	Proactive	VETNET	Whole trial area	Confirmed	From initial cull	36	97	28	11		D	Proactive	VETNET	Whole trial area	All breakdowns	From initial cull	47	97	36	13
D	Survey-only	VETNET	Whole trial area	Confirmed	From initial cull	40	106	30	8		D	Survey-only	VETNET	Whole trial area	All breakdowns	From initial cull	51	106	40	11
E	Proactive	VETNET	Whole trial area	Confirmed	From initial cull	36	116	26	4		E	Proactive	VETNET	Whole trial area	All breakdowns	From initial cull	68	116	33	8
E	Survey-only	VETNET	Whole trial area	Confirmed	From initial cull	56	97	28	14		E	Survey-only	VETNET	Whole trial area	All breakdowns	From initial cull	74	97	35	16
F	Proactive	VETNET	Whole trial area	Confirmed	From initial cull	15	138	12	4		F	Proactive	VETNET	Whole trial area	All breakdowns	From initial cull	37	138	18	5
F	Survey-only	VETNET	Whole trial area	Confirmed	From initial cull	61	191	35	11		F	Survey-only	VETNET	Whole trial area	All breakdowns	From initial cull	91	191	55	16
G	Proactive	VETNET	Whole trial area	Confirmed	From initial cull	72	245	26	7		G	Proactive	VETNET	Whole trial area	All breakdowns	From initial cull	99	245	41	12
G	Survey-only	VETNET	Whole trial area	Confirmed	From initial cull	40	131	16	4		G	Survey-only	VETNET	Whole trial area	All breakdowns	From initial cull	48	131	34	12
H	Proactive	VETNET	Whole trial area	Confirmed	From initial cull	31	63	23	11		H	Proactive	VETNET	Whole trial area	All breakdowns	From initial cull	44	63	26	13
H	Survey-only	VETNET	Whole trial area	Confirmed	From initial cull	27	130	22	7		H	Survey-only	VETNET	Whole trial area	All breakdowns	From initial cull	47	130	30	10
I	Proactive	VETNET	Whole trial area	Confirmed	From initial cull	27	100	29	15		I	Proactive	VETNET	Whole trial area	All breakdowns	From initial cull	39	100	38	16
I	Survey-only	VETNET	Whole trial area	Confirmed	From initial cull	21	98	19	6		I	Survey-only	VETNET	Whole trial area	All breakdowns	From initial cull	46	98	28	8
J	Proactive	VETNET	Whole trial area	Confirmed	From initial cull	34	114	25	8		J	Proactive	VETNET	Whole trial area	All breakdowns	From initial cull	54	114	38	11
J	Survey-only	VETNET	Whole trial area	Confirmed	From initial cull	36	123	18	10		J	Survey-only	VETNET	Whole trial area	All breakdowns	From initial cull	61	123	27	16
Triplet	Treatment	Source of location data	Region	Type of breakdown	Time period	Incidence	Baseline herds	Historic incidence (3 year)	Historic incidence (1 year)		Triplet	Treatment	Source of location data	Region	Type of breakdown	Time period	Incidence	Baseline herds	Historic incidence (3 year)	Historic incidence (1 year)
A	Proactive	VETNET	Inner trial area	Confirmed	From initial cull	13	24	7	1		A	Proactive	VETNET	Inner trial area	All breakdowns	From initial cull	15	24	9	2
A	Survey-only	VETNET	Inner trial area	Confirmed	From initial cull	22	27	11	2		A	Survey-only	VETNET	Inner trial area	All breakdowns	From initial cull	33	27	16	4
B	Proactive	VETNET	Inner trial area	Confirmed	From initial cull	19	39	13	4		B	Proactive	VETNET	Inner trial area	All breakdowns	From initial cull	23	39	15	5
B	Survey-only	VETNET	Inner trial area	Confirmed	From initial cull	3	13	4	1		B	Survey-only	VETNET	Inner trial area	All breakdowns	From initial cull	8	13	5	2
C	Proactive	VETNET	Inner trial area	Confirmed	From initial cull	4	36	3	3		C	Proactive	VETNET	Inner trial area	All breakdowns	From initial cull	5	36	5	5
C	Survey-only	VETNET	Inner trial area	Confirmed	From initial cull	20	43	4	2		C	Survey-only	VETNET	Inner trial area	All breakdowns	From initial cull	31	43	8	4
D	Proactive	VETNET	Inner trial area	Confirmed	From initial cull	14	39	11	3		D	Proactive	VETNET	Inner trial area	All breakdowns	From initial cull	18	39	14	4
D	Survey-only	VETNET	Inner trial area	Confirmed	From initial cull	14	34	16	4		D	Survey-only	VETNET	Inner trial area	All breakdowns	From initial cull	20	34	21	6
E	Proactive	VETNET	Inner trial area	Confirmed	From initial cull	13	27	9	1		E	Proactive	VETNET	Inner trial area	All breakdowns	From initial cull	20	27	11	2
E	Survey-only	VETNET	Inner trial area	Confirmed	From initial cull	13	18	4	3		E	Survey-only	VETNET	Inner trial area	All breakdowns	From initial cull	15	18	4	3
F	Proactive	VETNET	Inner trial area	Confirmed	From initial cull	3	27	1	0		F	Proactive	VETNET	Inner trial area	All breakdowns	From initial cull	5	27	2	0
F	Survey-only	VETNET	Inner trial area	Confirmed	From initial cull	16	62	9	3		F	Survey-only	VETNET	Inner trial area	All breakdowns	From initial cull	23	62	13	3
G	Proactive	VETNET	Inner trial area	Confirmed	From initial cull	10	75	12	2		G	Proactive	VETNET	Inner trial area	All breakdowns	From initial cull	23	75	16	4
G	Survey-only	VETNET	Inner trial area	Confirmed	From initial cull	13	36	7	3		G	Survey-only	VETNET	Inner trial area	All breakdowns	From initial cull	17	36	9	5
H	Proactive	VETNET	Inner trial area	Confirmed	From initial cull	10	12	8	2		H	Proactive	VETNET	Inner trial area	All breakdowns	From initial cull	15	12	8	2
H	Survey-only	VETNET	Inner trial area	Confirmed	From initial cull	8	28	5	1		H	Survey-only	VETNET	Inner trial area	All breakdowns	From initial cull	9	28	9	3
I	Proactive	VETNET	Inner trial area	Confirmed	From initial cull	10	33	8	5		I	Proactive	VETNET	Inner trial area	All breakdowns	From initial cull	16	33	10	6
I	Survey-only	VETNET	Inner trial area	Confirmed	From initial cull	6	28	3	0		I	Survey-only	VETNET	Inner trial area	All breakdowns	From initial cull	12	28	5	1
J	Proactive	VETNET	Inner trial area	Confirmed	From initial cull	11	27	8	2		J	Proactive	VETNET	Inner trial area	All breakdowns	From initial cull	14	27	11	3
J	Survey-only	VETNET	Inner trial area	Confirmed	From initial cull	17	45	14	7		J	Survey-only	VETNET	Inner trial area	All breakdowns	From initial cull	26	45	18	11
Triplet	Treatment	Source of location data	Region	Type of breakdown	Time period	Incidence	Baseline herds	Historic incidence (3 year)	Historic incidence (1 year)		Triplet	Treatment	Source of location data	Region	Type of breakdown	Time period	Incidence	Baseline herds	Historic incidence (3 year)	Historic incidence (1 year)
A	Proactive	VETNET	Outer trial area	Confirmed	From initial cull	24	47	26	7		A	Proactive	VETNET	Outer trial area	All breakdowns	From initial cull	37	47	29	8
A	Survey-only	VETNET	Outer trial area	Confirmed	From initial cull	30	59	21	5		A	Survey-only	VETNET	Outer trial area	All breakdowns	From initial cull	40	59	29	9
B	Proactive	VETNET	Outer trial area	Confirmed	From initial cull	68	113	29	11		B	Proactive	VETNET	Outer trial area	All breakdowns	From initial cull	87	113	46	16
B	Survey-only	VETNET	Outer trial area	Confirmed	From initial cull	58	119	23	4		B	Survey-only	VETNET	Outer trial area	All breakdowns	From initial cull	73	119	29	6
C	Proactive	VETNET	Outer trial area	Confirmed	From initial cull	25	69	12	5		C	Proactive	VETNET	Outer trial area	All breakdowns	From initial cull	35	69	16	7
C	Survey-only	VETNET	Outer trial area	Confirmed	From initial cull	64	131	23	12		C	Survey-only	VETNET	Outer trial area	All breakdowns	From initial cull	89	131	33	15
D	Proactive	VETNET	Outer trial area	Confirmed	From initial cull	22	58	17	8		D	Proactive	VETNET	Outer trial area	All breakdowns	From initial cull	29	58	22	9
D	Survey-only	VETNET	Outer trial area	Confirmed	From initial cull	26	72	14	4		D	Survey-only	VETNET	Outer trial area	All breakdowns	From initial cull	31	72	19	5
E	Proactive	VETNET	Outer trial area	Confirmed	From initial cull	23	89	17	3		E	Proactive	VETNET	Outer trial area	All breakdowns	From initial cull	48	89	22	6
E	Survey-only	VETNET	Outer trial area	Confirmed	From initial cull	43	79	24	11		E	Survey-only	VETNET	Outer trial area	All breakdowns	From initial cull	59	79	31	13
F	Proactive	VETNET	Outer trial area	Confirmed	From initial cull	12	111	11	4		F	Proactive	VETNET	Outer trial area	All breakdowns	From initial cull	32	111	16	5
F	Survey-only	VETNET	Outer trial area	Confirmed	From initial cull	45	129	26	8		F	Survey-only	VETNET	Outer trial area	All breakdowns	From initial cull	68	129	42	13
G	Proactive	VETNET	Outer trial area	Confirmed	From initial cull	62	170	14	5		G	Proactive	VETNET	Outer trial area	All breakdowns	From initial cull	76	170	25	8
G	Survey-only	VETNET	Outer trial area	Confirmed	From initial cull	27	95	9	1		G	Survey-only	VETNET	Outer trial area	All breakdowns	From initial cull	31	95	25	7
H	Proactive	VETNET	Outer trial area	Confirmed	From initial cull	21	51	15	9		H	Proactive	VETNET	Outer trial area	All breakdowns	From initial cull	29	51	18	11
H	Survey-only	VETNET	Outer trial area	Confirmed	From initial cull	19	102	17	6		H	Survey-only	VETNET	Outer trial area	All breakdowns	From initial cull	38	102	21	7
I	Proactive	VETNET	Outer trial area	Confirmed	From initial cull	17	67	21	10		I	Proactive	VETNET	Outer trial area	All breakdowns	From initial cull	23	67	28	10
I	Survey-only	VETNET	Outer trial area	Confirmed	From initial cull	15	70	16	6		I	Survey-only	VETNET	Outer trial area	All breakdowns	From initial cull	34	70	23	7
J	Proactive	VETNET	Outer trial area	Confirmed	From initial cull	23	87	17	6		J	Proactive	VETNET	Outer trial area	All breakdowns	From initial cull	40	87	27	8
J	Survey-only	VETNET	Outer trial area	Confirmed	From initial cull	19	78	4	3		J	Survey-only	VETNET	Outer trial area	All breakdowns	From initial cull	35	78	9	5
Triplet	Treatment	Source of location data	Region	Type of breakdown	Time period	Incidence	Baseline herds	Historic incidence (3 year)	Historic incidence (1 year)		Triplet	Treatment	Source of location data	Region	Type of breakdown	Time period	Incidence	Baseline herds	Historic incidence (3 year)	Historic incidence (1 year)
A	Proactive	VETNET	Neighbouring area	Confirmed	From initial cull	24	60	24	8		A	Proactive	VETNET	Neighbouring area	All breakdowns	From initial cull	30	60	30	8
A	Survey-only	VETNET	Neighbouring area	Confirmed	From initial cull	20	68	19	8		A	Survey-only	VETNET	Neighbouring area	All breakdowns	From initial cull	30	68	26	11
B	Proactive	VETNET	Neighbouring area	Confirmed	From initial cull	65	154	16	7		B	Proactive	VETNET	Neighbouring area	All breakdowns	From initial cull	95	154	24	10
B	Survey-only	VETNET	Neighbouring area	Confirmed	From initial cull	44	68	15	6		B	Survey-only	VETNET	Neighbouring area	All breakdowns	From initial cull	61	68	23	8
C	Proactive	VETNET	Neighbouring area	Confirmed	From initial cull	35	117	10	5		C	Proactive	VETNET	Neighbouring area	All breakdowns	From initial cull	57	117	16	6
C	Survey-only	VETNET	Neighbouring area	Confirmed	From initial cull	37	121	14	7		C	Survey-only	VETNET	Neighbouring area	All breakdowns	From initial cull	64	121	18	8
D	Proactive	VETNET	Neighbouring area	Confirmed	From initial cull	17	47	5	2		D	Proactive	VETNET	Neighbouring area	All breakdowns	From initial cull	21	47	7	2
D	Survey-only	VETNET	Neighbouring area	Confirmed	From initial cull	15	57	19	6		D	Survey-only	VETNET	Neighbouring area	All breakdowns	From initial cull	18	57	22	7
E	Proactive	VETNET	Neighbouring area	Confirmed	From initial cull	26	94	11	5		E	Proactive	VETNET	Neighbouring area	All breakdowns	From initial cull	45	94	17	5
E	Survey-only	VETNET	Neighbouring area	Confirmed	From initial cull	31	72	16	7		E	Survey-only	VETNET	Neighbouring area	All breakdowns	From initial cull	44	72	20	9
F	Proactive	VETNET	Neighbouring area	Confirmed	From initial cull	13	61	1	1		F	Proactive	VETNET	Neighbouring area	All breakdowns	From initial cull	15	61	3	1
F	Survey-only	VETNET	Neighbouring area	Confirmed	From initial cull	32	127	20	9		F	Survey-only	VETNET	Neighbouring area	All breakdowns	From initial cull	52	127	24	13
G	Proactive	VETNET	Neighbouring area	Confirmed	From initial cull	30	154	4	2		G	Proactive	VETNET	Neighbouring area	All breakdowns	From initial cull	40	154	7	2
G	Survey-only	VETNET	Neighbouring area	Confirmed	From initial cull	29	129	15	3		G	Survey-only	VETNET	Neighbouring area	All breakdowns	From initial cull	35	129	17	3
H	Proactive	VETNET	Neighbouring area	Confirmed	From initial cull	46	73	16	10		H	Proactive	VETNET	Neighbouring area	All breakdowns	From initial cull	58	73	20	12
H	Survey-only	VETNET	Neighbouring area	Confirmed	From initial cull	27	94	14	7		H	Survey-only	VETNET	Neighbouring area	All breakdowns	From initial cull	41	94	20	8
I	Proactive	VETNET	Neighbouring area	Confirmed	From initial cull	19	70	11	7		I	Proactive	VETNET	Neighbouring area	All breakdowns	From initial cull	24	70	20	11
I	Survey-only	VETNET	Neighbouring area	Confirmed	From initial cull	9	60	14	9		I	Survey-only	VETNET	Neighbouring area	All breakdowns	From initial cull	15	60	18	11
J	Proactive	VETNET	Neighbouring area	Confirmed	From initial cull	32	123	19	4		J	Proactive	VETNET	Neighbouring area	All breakdowns	From initial cull	48	123	31	8
J	Survey-only	VETNET	Neighbouring area	Confirmed	From initial cull	19	102	5	4		J	Survey-only	VETNET	Neighbouring area	All breakdowns	From initial cull	33	102	14	8

## Sheet: VETNET - From follow up
Triplet	Treatment	Source of location data	Region	Type of breakdown	Time period	Incidence	Baseline herds	Historic incidence (3 year)	Historic incidence (1 year)		Triplet	Treatment	Source of location data	Region	Type of breakdown	Time period	Incidence	Baseline herds	Historic incidence (3 year)	Historic incidence (1 year)
A	Proactive	VETNET	Whole trial area	Confirmed	From follow up	17	71	33	8		A	Proactive	VETNET	Whole trial area	All breakdowns	From follow up	28	71	38	10
A	Survey-only	VETNET	Whole trial area	Confirmed	From follow up	31	86	32	7		A	Survey-only	VETNET	Whole trial area	All breakdowns	From follow up	47	86	45	13
B	Proactive	VETNET	Whole trial area	Confirmed	From follow up	77	152	42	15		B	Proactive	VETNET	Whole trial area	All breakdowns	From follow up	95	152	61	21
B	Survey-only	VETNET	Whole trial area	Confirmed	From follow up	60	132	27	5		B	Survey-only	VETNET	Whole trial area	All breakdowns	From follow up	78	132	34	8
C	Proactive	VETNET	Whole trial area	Confirmed	From follow up	22	105	15	8		C	Proactive	VETNET	Whole trial area	All breakdowns	From follow up	30	105	21	12
C	Survey-only	VETNET	Whole trial area	Confirmed	From follow up	71	174	27	14		C	Survey-only	VETNET	Whole trial area	All breakdowns	From follow up	99	174	41	19
D	Proactive	VETNET	Whole trial area	Confirmed	From follow up	31	97	28	11		D	Proactive	VETNET	Whole trial area	All breakdowns	From follow up	42	97	36	13
D	Survey-only	VETNET	Whole trial area	Confirmed	From follow up	28	106	30	8		D	Survey-only	VETNET	Whole trial area	All breakdowns	From follow up	37	106	40	11
E	Proactive	VETNET	Whole trial area	Confirmed	From follow up	31	116	26	4		E	Proactive	VETNET	Whole trial area	All breakdowns	From follow up	58	116	33	8
E	Survey-only	VETNET	Whole trial area	Confirmed	From follow up	47	97	28	14		E	Survey-only	VETNET	Whole trial area	All breakdowns	From follow up	61	97	35	16
F	Proactive	VETNET	Whole trial area	Confirmed	From follow up	10	138	12	4		F	Proactive	VETNET	Whole trial area	All breakdowns	From follow up	30	138	18	5
F	Survey-only	VETNET	Whole trial area	Confirmed	From follow up	37	191	35	11		F	Survey-only	VETNET	Whole trial area	All breakdowns	From follow up	60	191	55	16
G	Proactive	VETNET	Whole trial area	Confirmed	From follow up	46	245	26	7		G	Proactive	VETNET	Whole trial area	All breakdowns	From follow up	66	245	41	12
G	Survey-only	VETNET	Whole trial area	Confirmed	From follow up	27	131	16	4		G	Survey-only	VETNET	Whole trial area	All breakdowns	From follow up	32	131	34	12
H	Proactive	VETNET	Whole trial area	Confirmed	From follow up	22	63	23	11		H	Proactive	VETNET	Whole trial area	All breakdowns	From follow up	31	63	26	13
H	Survey-only	VETNET	Whole trial area	Confirmed	From follow up	21	130	22	7		H	Survey-only	VETNET	Whole trial area	All breakdowns	From follow up	36	130	30	10
I	Proactive	VETNET	Whole trial area	Confirmed	From follow up	17	100	29	15		I	Proactive	VETNET	Whole trial area	All breakdowns	From follow up	24	100	38	16
I	Survey-only	VETNET	Whole trial area	Confirmed	From follow up	16	98	19	6		I	Survey-only	VETNET	Whole trial area	All breakdowns	From follow up	29	98	28	8
J	Proactive	VETNET	Whole trial area	Confirmed	From follow up	20	114	25	8		J	Proactive	VETNET	Whole trial area	All breakdowns	From follow up	36	114	38	11
J	Survey-only	VETNET	Whole trial area	Confirmed	From follow up	27	123	18	10		J	Survey-only	VETNET	Whole trial area	All breakdowns	From follow up	41	123	27	16
Triplet	Treatment	Source of location data	Region	Type of breakdown	Time period	Incidence	Baseline herds	Historic incidence (3 year)	Historic incidence (1 year)		Triplet	Treatment	Source of location data	Region	Type of breakdown	Time period	Incidence	Baseline herds	Historic incidence (3 year)	Historic incidence (1 year)
A	Proactive	VETNET	Inner trial area	Confirmed	From follow up	4	24	7	1		A	Proactive	VETNET	Inner trial area	All breakdowns	From follow up	6	24	9	2
A	Survey-only	VETNET	Inner trial area	Confirmed	From follow up	13	27	11	2		A	Survey-only	VETNET	Inner trial area	All breakdowns	From follow up	21	27	16	4
B	Proactive	VETNET	Inner trial area	Confirmed	From follow up	15	39	13	4		B	Proactive	VETNET	Inner trial area	All breakdowns	From follow up	18	39	15	5
B	Survey-only	VETNET	Inner trial area	Confirmed	From follow up	3	13	4	1		B	Survey-only	VETNET	Inner trial area	All breakdowns	From follow up	8	13	5	2
C	Proactive	VETNET	Inner trial area	Confirmed	From follow up	3	36	3	3		C	Proactive	VETNET	Inner trial area	All breakdowns	From follow up	3	36	5	5
C	Survey-only	VETNET	Inner trial area	Confirmed	From follow up	19	43	4	2		C	Survey-only	VETNET	Inner trial area	All breakdowns	From follow up	30	43	8	4
D	Proactive	VETNET	Inner trial area	Confirmed	From follow up	12	39	11	3		D	Proactive	VETNET	Inner trial area	All breakdowns	From follow up	16	39	14	4
D	Survey-only	VETNET	Inner trial area	Confirmed	From follow up	10	34	16	4		D	Survey-only	VETNET	Inner trial area	All breakdowns	From follow up	15	34	21	6
E	Proactive	VETNET	Inner trial area	Confirmed	From follow up	11	27	9	1		E	Proactive	VETNET	Inner trial area	All breakdowns	From follow up	17	27	11	2
E	Survey-only	VETNET	Inner trial area	Confirmed	From follow up	12	18	4	3		E	Survey-only	VETNET	Inner trial area	All breakdowns	From follow up	14	18	4	3
F	Proactive	VETNET	Inner trial area	Confirmed	From follow up	2	27	1	0		F	Proactive	VETNET	Inner trial area	All breakdowns	From follow up	4	27	2	0
F	Survey-only	VETNET	Inner trial area	Confirmed	From follow up	10	62	9	3		F	Survey-only	VETNET	Inner trial area	All breakdowns	From follow up	14	62	13	3
G	Proactive	VETNET	Inner trial area	Confirmed	From follow up	7	75	12	2		G	Proactive	VETNET	Inner trial area	All breakdowns	From follow up	17	75	16	4
G	Survey-only	VETNET	Inner trial area	Confirmed	From follow up	7	36	7	3		G	Survey-only	VETNET	Inner trial area	All breakdowns	From follow up	10	36	9	5
H	Proactive	VETNET	Inner trial area	Confirmed	From follow up	6	12	8	2		H	Proactive	VETNET	Inner trial area	All breakdowns	From follow up	8	12	8	2
H	Survey-only	VETNET	Inner trial area	Confirmed	From follow up	6	28	5	1		H	Survey-only	VETNET	Inner trial area	All breakdowns	From follow up	7	28	9	3
I	Proactive	VETNET	Inner trial area	Confirmed	From follow up	8	33	8	5		I	Proactive	VETNET	Inner trial area	All breakdowns	From follow up	11	33	10	6
I	Survey-only	VETNET	Inner trial area	Confirmed	From follow up	4	28	3	0		I	Survey-only	VETNET	Inner trial area	All breakdowns	From follow up	8	28	5	0
J	Proactive	VETNET	Inner trial area	Confirmed	From follow up	4	27	8	2		J	Proactive	VETNET	Inner trial area	All breakdowns	From follow up	5	27	11	3
J	Survey-only	VETNET	Inner trial area	Confirmed	From follow up	13	45	14	7		J	Survey-only	VETNET	Inner trial area	All breakdowns	From follow up	18	45	18	11
Triplet	Treatment	Source of location data	Region	Type of breakdown	Time period	Incidence	Baseline herds	Historic incidence (3 year)	Historic incidence (1 year)		Triplet	Treatment	Source of location data	Region	Type of breakdown	Time period	Incidence	Baseline herds	Historic incidence (3 year)	Historic incidence (1 year)
A	Proactive	VETNET	Outer trial area	Confirmed	From follow up	13	47	26	7		A	Proactive	VETNET	Outer trial area	All breakdowns	From follow up	22	47	29	8
A	Survey-only	VETNET	Outer trial area	Confirmed	From follow up	18	59	21	5		A	Survey-only	VETNET	Outer trial area	All breakdowns	From follow up	26	59	29	9
B	Proactive	VETNET	Outer trial area	Confirmed	From follow up	62	113	29	11		B	Proactive	VETNET	Outer trial area	All breakdowns	From follow up	77	113	46	16
B	Survey-only	VETNET	Outer trial area	Confirmed	From follow up	57	119	23	4		B	Survey-only	VETNET	Outer trial area	All breakdowns	From follow up	70	119	29	6
C	Proactive	VETNET	Outer trial area	Confirmed	From follow up	19	69	12	5		C	Proactive	VETNET	Outer trial area	All breakdowns	From follow up	27	69	16	7
C	Survey-only	VETNET	Outer trial area	Confirmed	From follow up	52	131	23	12		C	Survey-only	VETNET	Outer trial area	All breakdowns	From follow up	69	131	33	15
D	Proactive	VETNET	Outer trial area	Confirmed	From follow up	19	58	17	8		D	Proactive	VETNET	Outer trial area	All breakdowns	From follow up	26	58	22	9
D	Survey-only	VETNET	Outer trial area	Confirmed	From follow up	18	72	14	4		D	Survey-only	VETNET	Outer trial area	All breakdowns	From follow up	22	72	19	5
E	Proactive	VETNET	Outer trial area	Confirmed	From follow up	20	89	17	3		E	Proactive	VETNET	Outer trial area	All breakdowns	From follow up	41	89	22	6
E	Survey-only	VETNET	Outer trial area	Confirmed	From follow up	35	79	24	11		E	Survey-only	VETNET	Outer trial area	All breakdowns	From follow up	47	79	31	13
F	Proactive	VETNET	Outer trial area	Confirmed	From follow up	8	111	11	4		F	Proactive	VETNET	Outer trial area	All breakdowns	From follow up	26	111	16	5
F	Survey-only	VETNET	Outer trial area	Confirmed	From follow up	27	129	26	8		F	Survey-only	VETNET	Outer trial area	All breakdowns	From follow up	46	129	42	13
G	Proactive	VETNET	Outer trial area	Confirmed	From follow up	39	170	14	5		G	Proactive	VETNET	Outer trial area	All breakdowns	From follow up	49	170	25	8
G	Survey-only	VETNET	Outer trial area	Confirmed	From follow up	20	95	9	1		G	Survey-only	VETNET	Outer trial area	All breakdowns	From follow up	22	95	25	7
H	Proactive	VETNET	Outer trial area	Confirmed	From follow up	16	51	15	9		H	Proactive	VETNET	Outer trial area	All breakdowns	From follow up	23	51	18	11
H	Survey-only	VETNET	Outer trial area	Confirmed	From follow up	15	102	17	6		H	Survey-only	VETNET	Outer trial area	All breakdowns	From follow up	29	102	21	7
I	Proactive	VETNET	Outer trial area	Confirmed	From follow up	9	67	21	10		I	Proactive	VETNET	Outer trial area	All breakdowns	From follow up	13	67	28	10
I	Survey-only	VETNET	Outer trial area	Confirmed	From follow up	12	70	16	6		I	Survey-only	VETNET	Outer trial area	All breakdowns	From follow up	21	70	23	7
J	Proactive	VETNET	Outer trial area	Confirmed	From follow up	16	87	17	6		J	Proactive	VETNET	Outer trial area	All breakdowns	From follow up	31	87	27	8
J	Survey-only	VETNET	Outer trial area	Confirmed	From follow up	14	78	4	3		J	Survey-only	VETNET	Outer trial area	All breakdowns	From follow up	23	78	9	5
Triplet	Treatment	Source of location data	Region	Type of breakdown	Time period	Incidence	Baseline herds	Historic incidence (3 year)	Historic incidence (1 year)		Triplet	Treatment	Source of location data	Region	Type of breakdown	Time period	Incidence	Baseline herds	Historic incidence (3 year)	Historic incidence (1 year)
A	Proactive	VETNET	Neighbouring area	Confirmed	From follow up	14	60	24	8		A	Proactive	VETNET	Neighbouring area	All breakdowns	From follow up	19	60	30	8
A	Survey-only	VETNET	Neighbouring area	Confirmed	From follow up	15	68	19	8		A	Survey-only	VETNET	Neighbouring area	All breakdowns	From follow up	22	68	26	11
B	Proactive	VETNET	Neighbouring area	Confirmed	From follow up	59	154	16	7		B	Proactive	VETNET	Neighbouring area	All breakdowns	From follow up	85	154	24	10
B	Survey-only	VETNET	Neighbouring area	Confirmed	From follow up	41	68	15	6		B	Survey-only	VETNET	Neighbouring area	All breakdowns	From follow up	56	68	23	8
C	Proactive	VETNET	Neighbouring area	Confirmed	From follow up	30	117	10	5		C	Proactive	VETNET	Neighbouring area	All breakdowns	From follow up	50	117	16	6
C	Survey-only	VETNET	Neighbouring area	Confirmed	From follow up	34	121	14	7		C	Survey-only	VETNET	Neighbouring area	All breakdowns	From follow up	59	121	18	8
D	Proactive	VETNET	Neighbouring area	Confirmed	From follow up	15	47	5	2		D	Proactive	VETNET	Neighbouring area	All breakdowns	From follow up	18	47	7	2
D	Survey-only	VETNET	Neighbouring area	Confirmed	From follow up	11	57	19	6		D	Survey-only	VETNET	Neighbouring area	All breakdowns	From follow up	14	57	22	7
E	Proactive	VETNET	Neighbouring area	Confirmed	From follow up	22	94	11	5		E	Proactive	VETNET	Neighbouring area	All breakdowns	From follow up	40	94	17	5
E	Survey-only	VETNET	Neighbouring area	Confirmed	From follow up	26	72	16	7		E	Survey-only	VETNET	Neighbouring area	All breakdowns	From follow up	38	72	20	9
F	Proactive	VETNET	Neighbouring area	Confirmed	From follow up	11	61	1	1		F	Proactive	VETNET	Neighbouring area	All breakdowns	From follow up	13	61	3	1
F	Survey-only	VETNET	Neighbouring area	Confirmed	From follow up	21	127	20	9		F	Survey-only	VETNET	Neighbouring area	All breakdowns	From follow up	39	127	24	13
G	Proactive	VETNET	Neighbouring area	Confirmed	From follow up	18	154	4	2		G	Proactive	VETNET	Neighbouring area	All breakdowns	From follow up	26	154	7	2
G	Survey-only	VETNET	Neighbouring area	Confirmed	From follow up	22	129	15	3		G	Survey-only	VETNET	Neighbouring area	All breakdowns	From follow up	26	129	17	3
H	Proactive	VETNET	Neighbouring area	Confirmed	From follow up	30	73	16	10		H	Proactive	VETNET	Neighbouring area	All breakdowns	From follow up	40	73	20	12
H	Survey-only	VETNET	Neighbouring area	Confirmed	From follow up	20	94	14	7		H	Survey-only	VETNET	Neighbouring area	All breakdowns	From follow up	30	94	20	8
I	Proactive	VETNET	Neighbouring area	Confirmed	From follow up	16	70	11	7		I	Proactive	VETNET	Neighbouring area	All breakdowns	From follow up	18	70	20	11
I	Survey-only	VETNET	Neighbouring area	Confirmed	From follow up	5	60	14	9		I	Survey-only	VETNET	Neighbouring area	All breakdowns	From follow up	10	60	18	11
J	Proactive	VETNET	Neighbouring area	Confirmed	From follow up	20	123	19	4		J	Proactive	VETNET	Neighbouring area	All breakdowns	From follow up	33	123	31	8
J	Survey-only	VETNET	Neighbouring area	Confirmed	From follow up	12	102	5	4		J	Survey-only	VETNET	Neighbouring area	All breakdowns	From follow up	22	102	14	8
