# Supplementary material for: Absence of effects of widespread badger culling on tuberculosis in cattle
Source: Research Square preprint supplement (doi:10.21203/rs.3.rs-2362912/v1), 2022-12-13
Supplement: Supplementary file 2 [file 84fc770e15fffbd33101d582.xlsx]

## Sheet: rbctconf
Triplet	Treatment	Source of location data	Region	Type of breakdown	Time period	Incidence	Baseline	Hist3yr	Hist1year	yrs_since_initialcull	hdyrsrisk	A	B	C	D	E	F	G	H	I	J
A	Proactive	VETNET	Whole trial area	Confirmed	From follow up	52	71	38	10	5.6	397.6	1	0	0	0	0	0	0	0	0	0
A	Survey-only	VETNET	Whole trial area	Confirmed	From follow up	73	86	45	13	5.6	481.6	1	0	0	0	0	0	0	0	0	0
B	Proactive	VETNET	Whole trial area	Confirmed	From follow up	110	152	61	21	6.73	1022.96	0	1	0	0	0	0	0	0	0	0
B	Survey-only	VETNET	Whole trial area	Confirmed	From follow up	81	132	34	8	6.73	888.36	0	1	0	0	0	0	0	0	0	0
C	Proactive	VETNET	Whole trial area	Confirmed	From follow up	40	105	21	12	5.85	614.25	0	0	1	0	0	0	0	0	0	0
C	Survey-only	VETNET	Whole trial area	Confirmed	From follow up	120	174	41	19	5.85	1017.9	0	0	1	0	0	0	0	0	0	0
D	Proactive	VETNET	Whole trial area	Confirmed	From follow up	47	97	36	13	2.72	263.84	0	0	0	1	0	0	0	0	0	0
D	Survey-only	VETNET	Whole trial area	Confirmed	From follow up	51	106	40	11	2.72	288.32	0	0	0	1	0	0	0	0	0	0
E	Proactive	VETNET	Whole trial area	Confirmed	From follow up	68	116	33	8	5.28	612.48	0	0	0	0	1	0	0	0	0	0
E	Survey-only	VETNET	Whole trial area	Confirmed	From follow up	74	97	35	16	5.28	512.16	0	0	0	0	1	0	0	0	0	0
F	Proactive	VETNET	Whole trial area	Confirmed	From follow up	37	138	18	5	5.13	707.94	0	0	0	0	0	1	0	0	0	0
F	Survey-only	VETNET	Whole trial area	Confirmed	From follow up	91	191	55	16	5.13	979.83	0	0	0	0	0	1	0	0	0	0
G	Proactive	VETNET	Whole trial area	Confirmed	From follow up	99	245	41	12	4.82	1180.9	0	0	0	0	0	0	1	0	0	0
G	Survey-only	VETNET	Whole trial area	Confirmed	From follow up	48	131	34	12	4.82	631.42	0	0	0	0	0	0	1	0	0	0
H	Proactive	VETNET	Whole trial area	Confirmed	From follow up	44	63	26	13	4.72	297.36	0	0	0	0	0	0	0	1	0	0
H	Survey-only	VETNET	Whole trial area	Confirmed	From follow up	47	130	30	10	4.72	613.6	0	0	0	0	0	0	0	1	0	0
I	Proactive	VETNET	Whole trial area	Confirmed	From follow up	39	100	38	16	2.91	291	0	0	0	0	0	0	0	0	1	0
I	Survey-only	VETNET	Whole trial area	Confirmed	From follow up	46	98	28	8	2.91	285.18	0	0	0	0	0	0	0	0	1	0
J	Proactive	VETNET	Whole trial area	Confirmed	From follow up	54	114	38	11	2.88	328.32	0	0	0	0	0	0	0	0	0	1
J	Survey-only	VETNET	Whole trial area	Confirmed	From follow up	61	123	27	16	2.88	354.24	0	0	0	0	0	0	0	0	0	1

## Sheet: rbct_allbreakdowns
Triplet	Treatment	Source of location data	Region	Type of breakdown	Time period	Incidence	Baseline	Hist3yr	Hist1yr	Years_since_initial_cull	hrdyrsrisk	A	B	C	D	E	F	G	H	I	J
A	Proactive	VETNET	Whole trial area	All breakdowns	From initial cull	52	71	38	10	5.6	397.6	1	0	0	0	0	0	0	0	0	0
A	Survey-only	VETNET	Whole trial area	All breakdowns	From initial cull	73	86	45	13	5.6	481.6	1	0	0	0	0	0	0	0	0	0
B	Proactive	VETNET	Whole trial area	All breakdowns	From initial cull	110	152	61	21	6.73	1022.96	0	1	0	0	0	0	0	0	0	0
B	Survey-only	VETNET	Whole trial area	All breakdowns	From initial cull	81	132	34	8	6.73	888.36	0	1	0	0	0	0	0	0	0	0
C	Proactive	VETNET	Whole trial area	All breakdowns	From initial cull	40	105	21	12	5.85	614.25	0	0	1	0	0	0	0	0	0	0
C	Survey-only	VETNET	Whole trial area	All breakdowns	From initial cull	120	174	41	19	5.85	1017.9	0	0	1	0	0	0	0	0	0	0
D	Proactive	VETNET	Whole trial area	All breakdowns	From initial cull	47	97	36	13	2.72	263.84	0	0	0	1	0	0	0	0	0	0
D	Survey-only	VETNET	Whole trial area	All breakdowns	From initial cull	51	106	40	11	2.72	288.32	0	0	0	1	0	0	0	0	0	0
E	Proactive	VETNET	Whole trial area	All breakdowns	From initial cull	68	116	33	8	5.28	612.48	0	0	0	0	1	0	0	0	0	0
E	Survey-only	VETNET	Whole trial area	All breakdowns	From initial cull	74	97	35	16	5.28	512.16	0	0	0	0	1	0	0	0	0	0
F	Proactive	VETNET	Whole trial area	All breakdowns	From initial cull	37	138	18	5	5.13	707.94	0	0	0	0	0	1	0	0	0	0
F	Survey-only	VETNET	Whole trial area	All breakdowns	From initial cull	91	191	55	16	5.13	979.83	0	0	0	0	0	1	0	0	0	0
G	Proactive	VETNET	Whole trial area	All breakdowns	From initial cull	99	245	41	12	4.82	1180.9	0	0	0	0	0	0	1	0	0	0
G	Survey-only	VETNET	Whole trial area	All breakdowns	From initial cull	48	131	34	12	4.82	631.42	0	0	0	0	0	0	1	0	0	0
H	Proactive	VETNET	Whole trial area	All breakdowns	From initial cull	44	63	26	13	4.72	297.36	0	0	0	0	0	0	0	1	0	0
H	Survey-only	VETNET	Whole trial area	All breakdowns	From initial cull	47	130	30	10	4.72	613.6	0	0	0	0	0	0	0	1	0	0
I	Proactive	VETNET	Whole trial area	All breakdowns	From initial cull	39	100	38	16	2.91	291	0	0	0	0	0	0	0	0	1	0
I	Survey-only	VETNET	Whole trial area	All breakdowns	From initial cull	46	98	28	8	2.91	285.18	0	0	0	0	0	0	0	0	1	0
J	Proactive	VETNET	Whole trial area	All breakdowns	From initial cull	54	114	38	11	2.88	328.32	0	0	0	0	0	0	0	0	0	1
J	Survey-only	VETNET	Whole trial area	All breakdowns	From initial cull	61	123	27	16	2.88	354.24	0	0	0	0	0	0	0	0	0	1

## Sheet: peturb
Triplet	Treatment	Source of location data	Region	Type of breakdown	Time period	Incidence	Baseline	Hist3yr	Hist1yr	hdyrsrisk	yrs_rsk	A	B	C	D	E	F	G	H	I	J
A	Proactive	VETNET	Neighbouring area	Confirmed	From initial cull	24	60	24	8	336	5.6	1	0	0	0	0	0	0	0	0	0
A	Survey-only	VETNET	Neighbouring area	Confirmed	From initial cull	20	68	19	8	380.8	5.6	1	0	0	0	0	0	0	0	0	0
B	Proactive	VETNET	Neighbouring area	Confirmed	From initial cull	65	154	16	7	1036.42	6.73	0	1	0	0	0	0	0	0	0	0
B	Survey-only	VETNET	Neighbouring area	Confirmed	From initial cull	44	68	15	6	457.64	6.73	0	1	0	0	0	0	0	0	0	0
C	Proactive	VETNET	Neighbouring area	Confirmed	From initial cull	35	117	10	5	684.45	5.85	0	0	1	0	0	0	0	0	0	0
C	Survey-only	VETNET	Neighbouring area	Confirmed	From initial cull	37	121	14	7	707.85	5.85	0	0	1	0	0	0	0	0	0	0
D	Proactive	VETNET	Neighbouring area	Confirmed	From initial cull	17	47	5	2	127.84	2.72	0	0	0	1	0	0	0	0	0	0
D	Survey-only	VETNET	Neighbouring area	Confirmed	From initial cull	15	57	19	6	155.04	2.72	0	0	0	1	0	0	0	0	0	0
E	Proactive	VETNET	Neighbouring area	Confirmed	From initial cull	26	94	11	5	496.32	5.28	0	0	0	0	1	0	0	0	0	0
E	Survey-only	VETNET	Neighbouring area	Confirmed	From initial cull	31	72	16	7	380.16	5.28	0	0	0	0	1	0	0	0	0	0
F	Proactive	VETNET	Neighbouring area	Confirmed	From initial cull	13	61	1	1	312.93	5.13	0	0	0	0	0	1	0	0	0	0
F	Survey-only	VETNET	Neighbouring area	Confirmed	From initial cull	32	127	20	9	651.51	5.13	0	0	0	0	0	1	0	0	0	0
G	Proactive	VETNET	Neighbouring area	Confirmed	From initial cull	30	154	4	2	742.28	4.82	0	0	0	0	0	0	1	0	0	0
G	Survey-only	VETNET	Neighbouring area	Confirmed	From initial cull	29	129	15	3	621.78	4.82	0	0	0	0	0	0	1	0	0	0
H	Proactive	VETNET	Neighbouring area	Confirmed	From initial cull	46	73	16	10	344.56	4.72	0	0	0	0	0	0	0	1	0	0
H	Survey-only	VETNET	Neighbouring area	Confirmed	From initial cull	27	94	14	7	443.68	4.72	0	0	0	0	0	0	0	1	0	0
I	Proactive	VETNET	Neighbouring area	Confirmed	From initial cull	19	70	11	7	203.7	2.91	0	0	0	0	0	0	0	0	1	0
I	Survey-only	VETNET	Neighbouring area	Confirmed	From initial cull	9	60	14	9	174.6	2.91	0	0	0	0	0	0	0	0	1	0
J	Proactive	VETNET	Neighbouring area	Confirmed	From initial cull	32	123	19	4	354.24	2.88	0	0	0	0	0	0	0	0	0	1
J	Survey-only	VETNET	Neighbouring area	Confirmed	From initial cull	19	102	5	4	293.76	2.88	0	0	0	0	0	0	0	0	0	1

## Sheet: Contents
Sheet rbctconf is the data on confirmed breakdowns, baseline herds, treatment groups and baseline herds. This is directly copied from the data files of the 2006 paper. Years at risk was taken from the additional material from the 2006 paper, but was not included in the original data files. Herd years at risk is calculated from years at risk multiplied by baseline herds. The spreadsheet can be dir…
Sheet rbct_allbreakdowns gives similar data to sheet rbctconf, but for all breakdowns, not just confirmed breakdowns. This data was taken directly from supplementary material of the 2006 paper
Sheet perturb contains the data from the neighbouring areas so that the so call perturbation effect can be analyzed. Again all data copied or extracted from supplementary material of the 2006 paper
In each data set, there is also a set of dummy variables, A to J which represent the triplets. This is to facilitate the Bayesian analysis
